# Supplementary material
Source: publisher figshare collection journal article supplement (https://springernature.figshare.com/ndownloader/files/14117876)
Supplement: Supplementary file [file 14117876]

## Topic areas covered in the interviews for the qualitative evaluation

- **Review of LIB experience**
  - Purpose of the board
  - Membership of the board
    - Representative of all stakeholders?
  - Governance of the board
  - What the board has achieved
  - What still needs to be done
  - What improvements could be made
  - Maintaining interest and momentum
- **Objectives of the board**
  - Clarity of objectives
  - Focus of the objectives
  - Ability to change and adapt as needed
  - Management of risks
- **Responsiveness of the board**
  - Ability to respond to problems/early warning signs
  - Communication and meeting schedules
  - Ability to take action
- **Sub-groups**
  - Purpose of sub-groups
  - Function of sub-groups
  - Achievements of sub-groups
  - Future of sub-groups
- **Partnership functioning**
  - Support of pan London collaboration
  - Promotion of collective responsibility for the aims of the immunisation programme
  - Links with national level boards and organisations
  - Links between LIB and groups leading on immunisation borough action plans
- **Forward planning**
  - Reviewing future of the board
    - Aims & objectives
    - Membership
  - Future focus
